# Supplementary material for: Artemisinin Binds and Inhibits the Activity of Plasmodium falciparum Ddi1, a Retroviral Aspartyl Protease
Source: MDPI journal article supplement (doi:10.3390/pathogens10111465), 2021-11-11
Supplement: s1 [file s1]

**Supplementary Figure S1: Expression and purification of full length *Pf*Ddi1 gene**

**a**

Full length *Pf*Ddi1

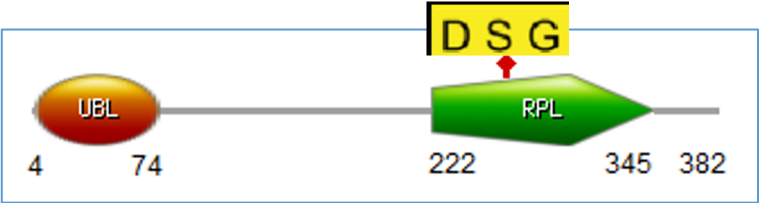

**b**

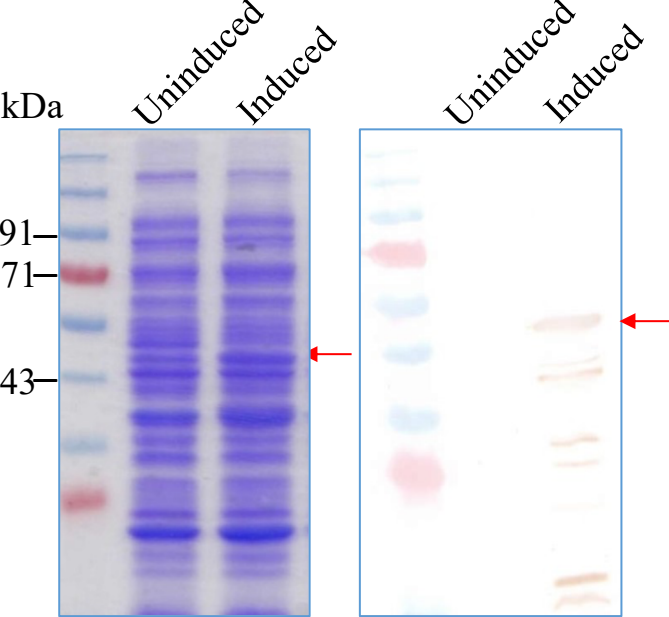

**c**

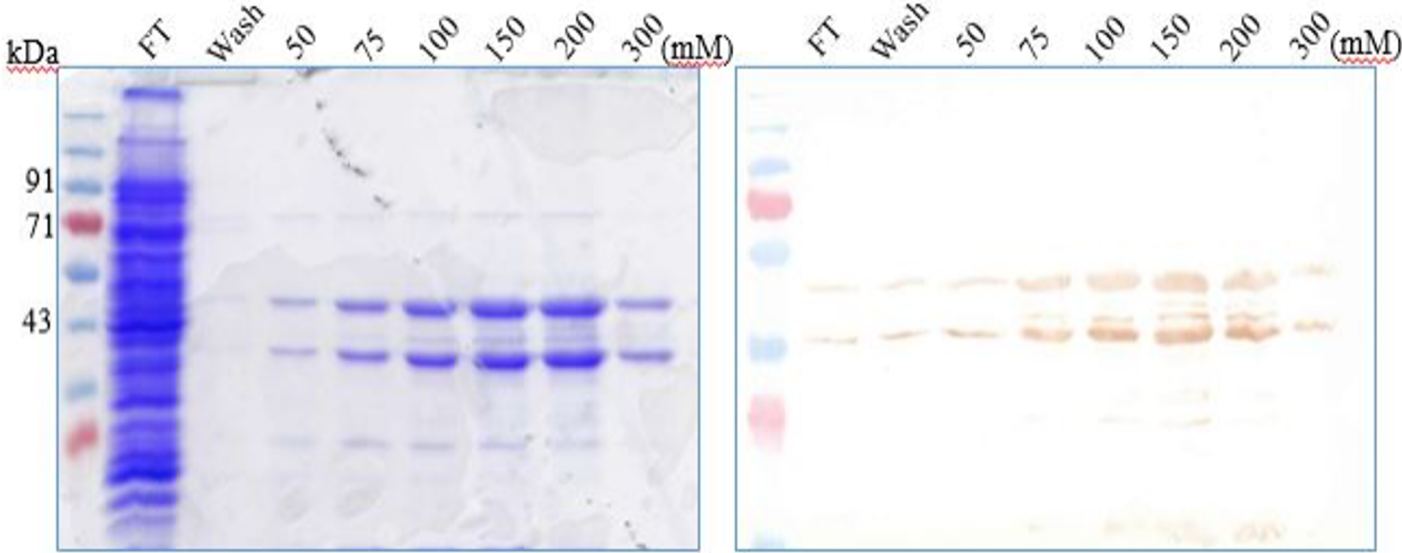

**d**

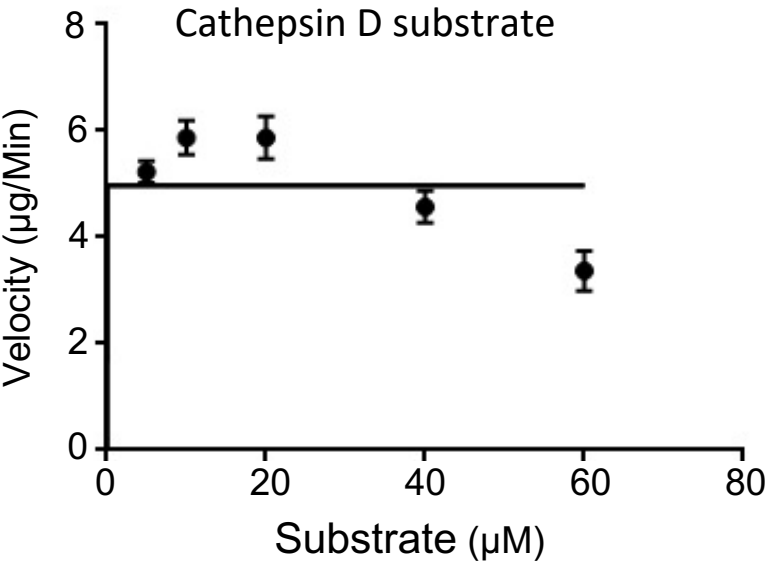

Supplementary Figure S2: LC-MS/MS proteome analysis of purified *Pf*Ddi1 fragments

a

~44 kDa *Pf*Ddi1

Sample Peptide reads

| Accession     | Description                                                                                                                                                                                    | Score   | Coverage | # Proteins | # Unique Peptides | # Peptides | # PSMs | # AAs | MW [kDa] | calc. pI |                                                            |
|---------------|------------------------------------------------------------------------------------------------------------------------------------------------------------------------------------------------|---------|----------|------------|-------------------|------------|--------|-------|----------|----------|------------------------------------------------------------|
| PF3D7_1409300 | organism=Plasmodium_falciparum_3D7   product=DNA damage-inducible protein 1, putative (DDI1)   location=Pf3D7_14_v3:363092-364240(+)   length=382   sequence_SO=chromosome   SO=protein_coding | 2072.85 | 75.92    | 1          | 48                | 48         | 691    | 382   | 43.8     | 5.06     | FIYENIYKNEINnnLALAEHFPEAFGVVFMlyI PVEInKNTVHAFVDSGAQSSImSK |
|               |                                                                                                                                                                                                |         |          |            |                   |            |        |       |          |          | KISADImNDnVnNmSALNNILSTNNNVGNIGN IGNNLNnENVQNLNNPAFK       |
|               |                                                                                                                                                                                                |         |          |            |                   |            |        |       |          |          | LQDEPLYNAIFSQNLEEIK                                        |
|               |                                                                                                                                                                                                |         |          |            |                   |            |        |       |          |          | FIYENIYKNEINnnLALAEHFPEAFGVVFMlyI PVEInK                   |
|               |                                                                                                                                                                                                |         |          |            |                   |            |        |       |          |          | FIYENIYKNEINnnLALAEHFPEAFGVVFMlyI PVEInKNTVHAFVDSGAQSSIMSK |

b

~34 kDa *Pf*Ddi1

Sample Peptide reads

| Accession     | Description                                                                                                                                                                                    | Score   | Coverage | # Proteins | # Unique Peptides | # Peptides | # PSMs | # AAs | MW [kDa] | calc. pI |                                                             |
|---------------|------------------------------------------------------------------------------------------------------------------------------------------------------------------------------------------------|---------|----------|------------|-------------------|------------|--------|-------|----------|----------|-------------------------------------------------------------|
| PF3D7_1409300 | organism=Plasmodium_falciparum_3D7   product=DNA damage-inducible protein 1, putative (DDI1)   location=Pf3D7_14_v3:363092-364240(+)   length=382   sequence_SO=chromosome   SO=protein_coding | 2200.58 | 73.56    | 1          | 46                | 46         | 700    | 382   | 43.8     | 5.06     | LQDEPLYNAIFSQNLEEIK                                         |
|               |                                                                                                                                                                                                |         |          |            |                   |            |        |       |          |          | LQDEPLYnAIFSQNLEEIK                                         |
|               |                                                                                                                                                                                                |         |          |            |                   |            |        |       |          |          | FIYENIYKNEINNNLALaQEHFPEAFGVVFMlyI PVEInKnTVHAFVDSGAQSSImSK |
|               |                                                                                                                                                                                                |         |          |            |                   |            |        |       |          |          | FIYENIYKnEinNNLALAEHFPEAFGVVFMlyI PVEINK                    |
|               |                                                                                                                                                                                                |         |          |            |                   |            |        |       |          |          | KISADIMNDNVNNmSALNNILSTNNNVGNIGNIGNNNLNnEnVQNLNNPAFK        |



# Supplementary Figure S3: Hydrolysis of substrates by the recombinant *Pf*Ddi1 enzyme

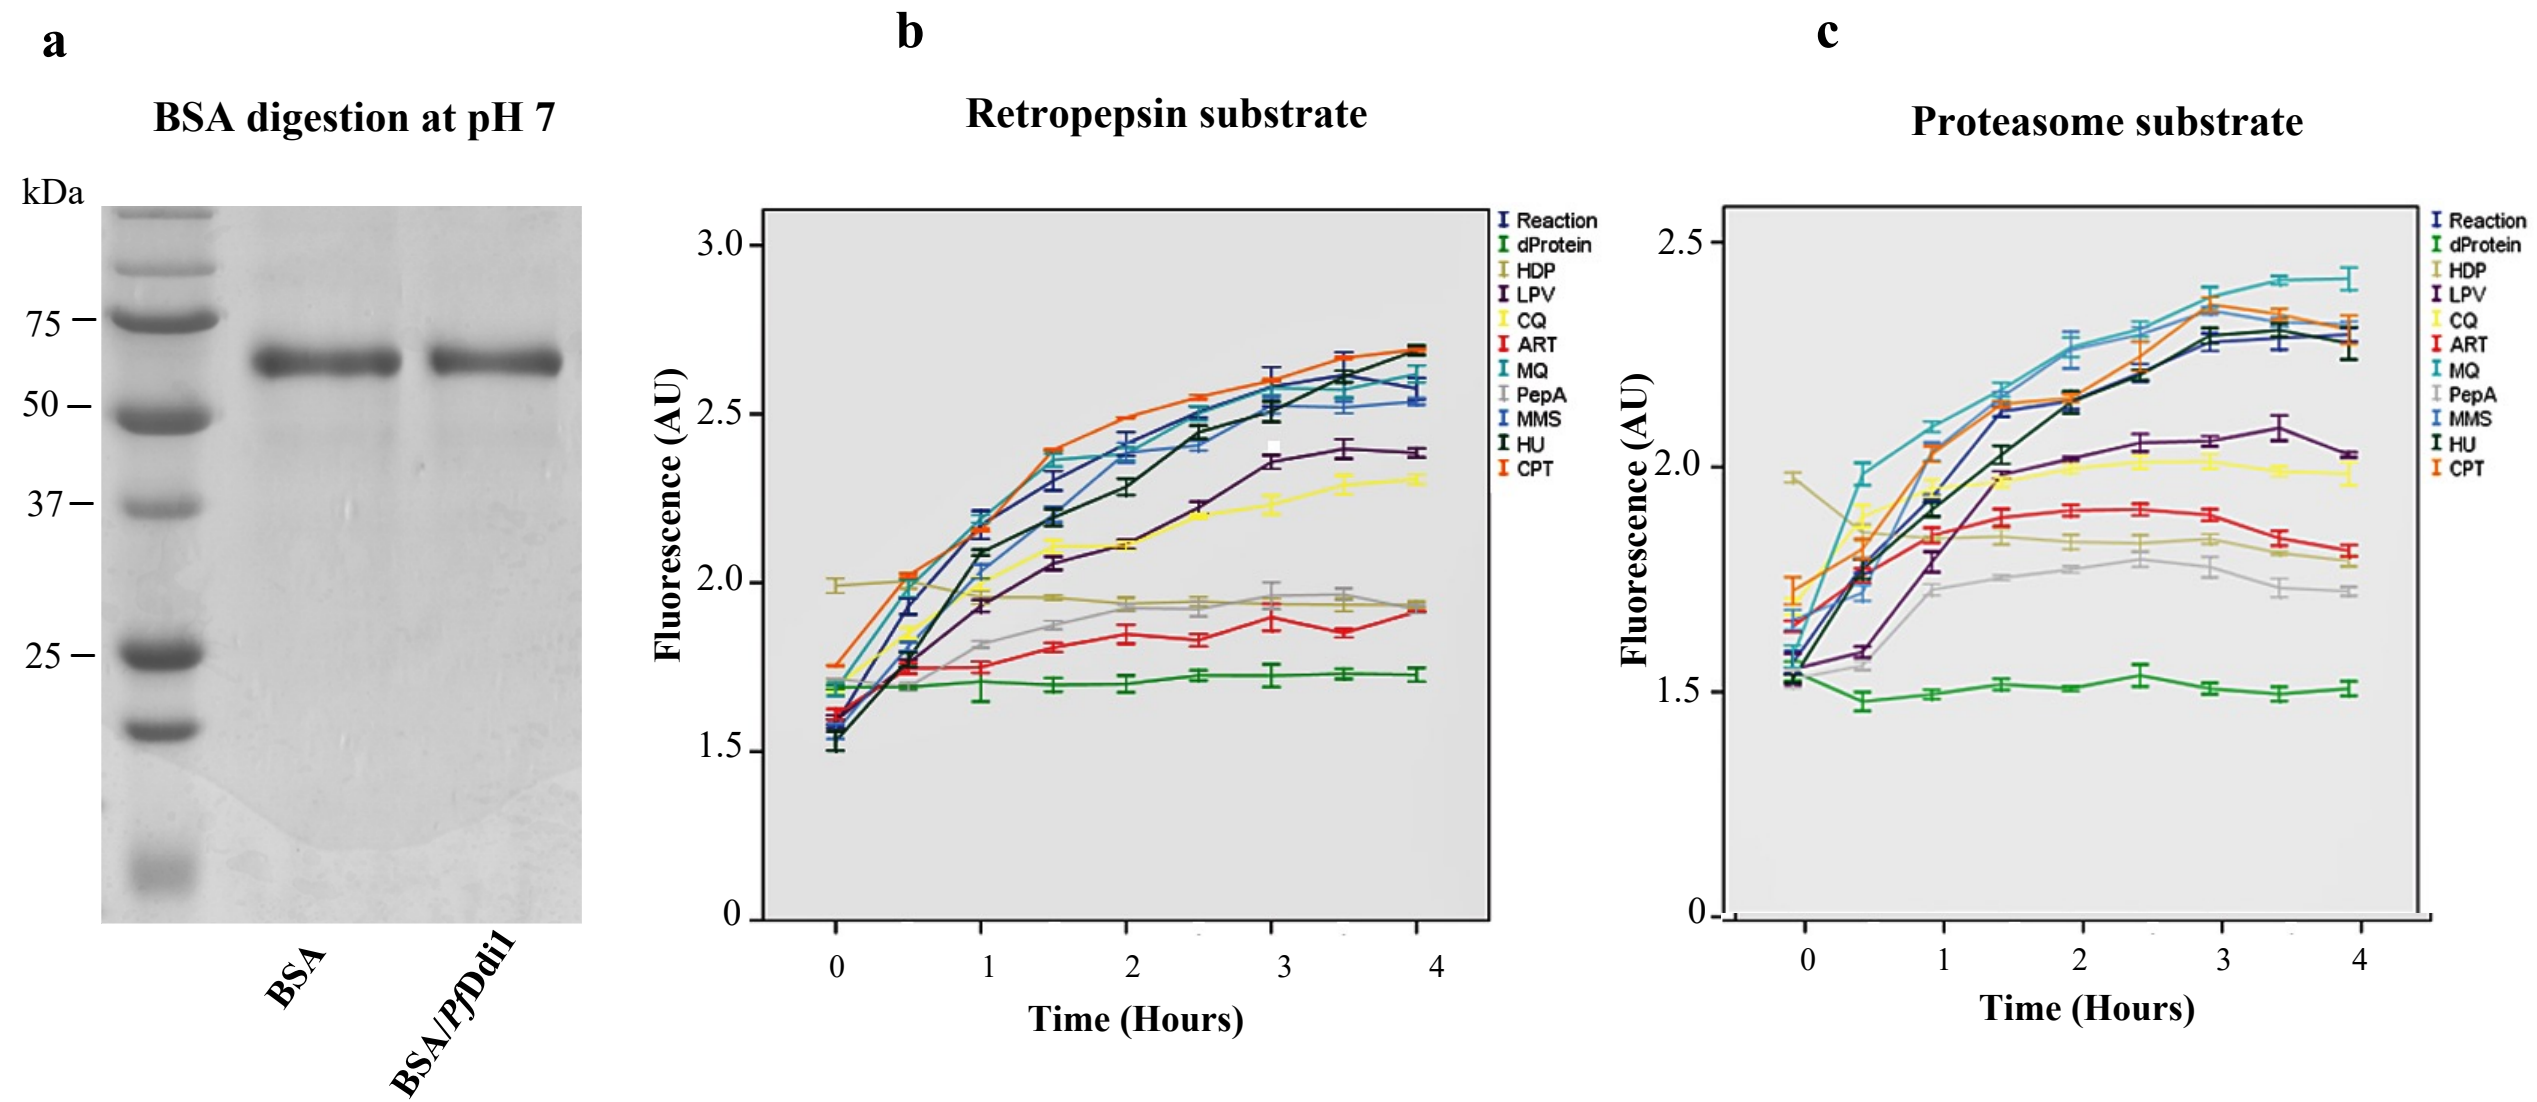

**Supplementary Figure S4: Artemisinin treatment leads to increased recruitment of *Pf*Ddi1 into the nucleus**

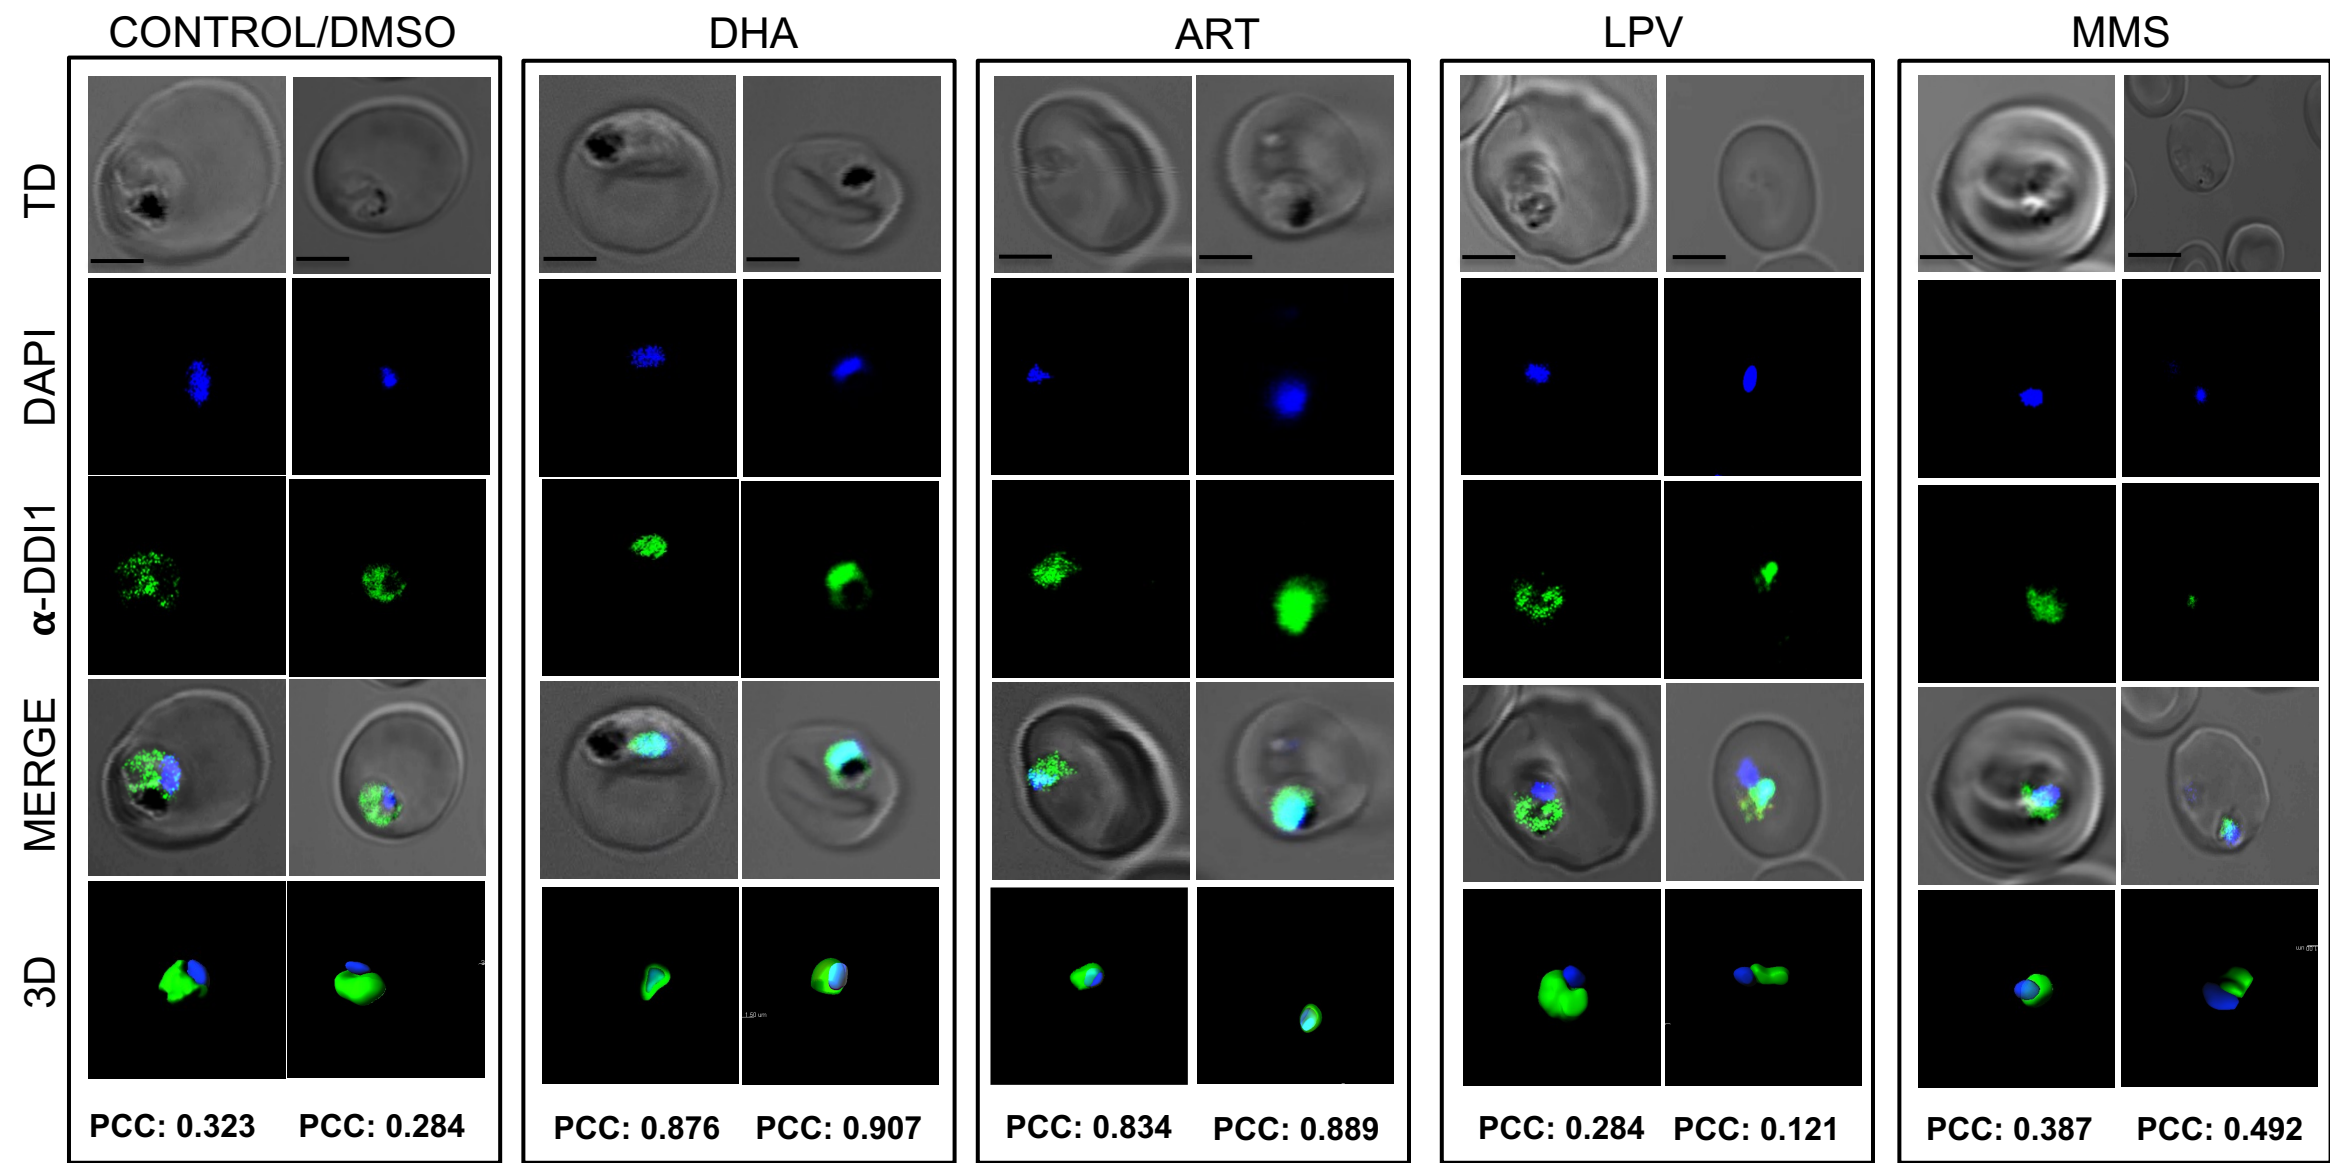

**Supplementary Figure S5: Microscopic analysis of parasite morphologies under artemisinin treatment**

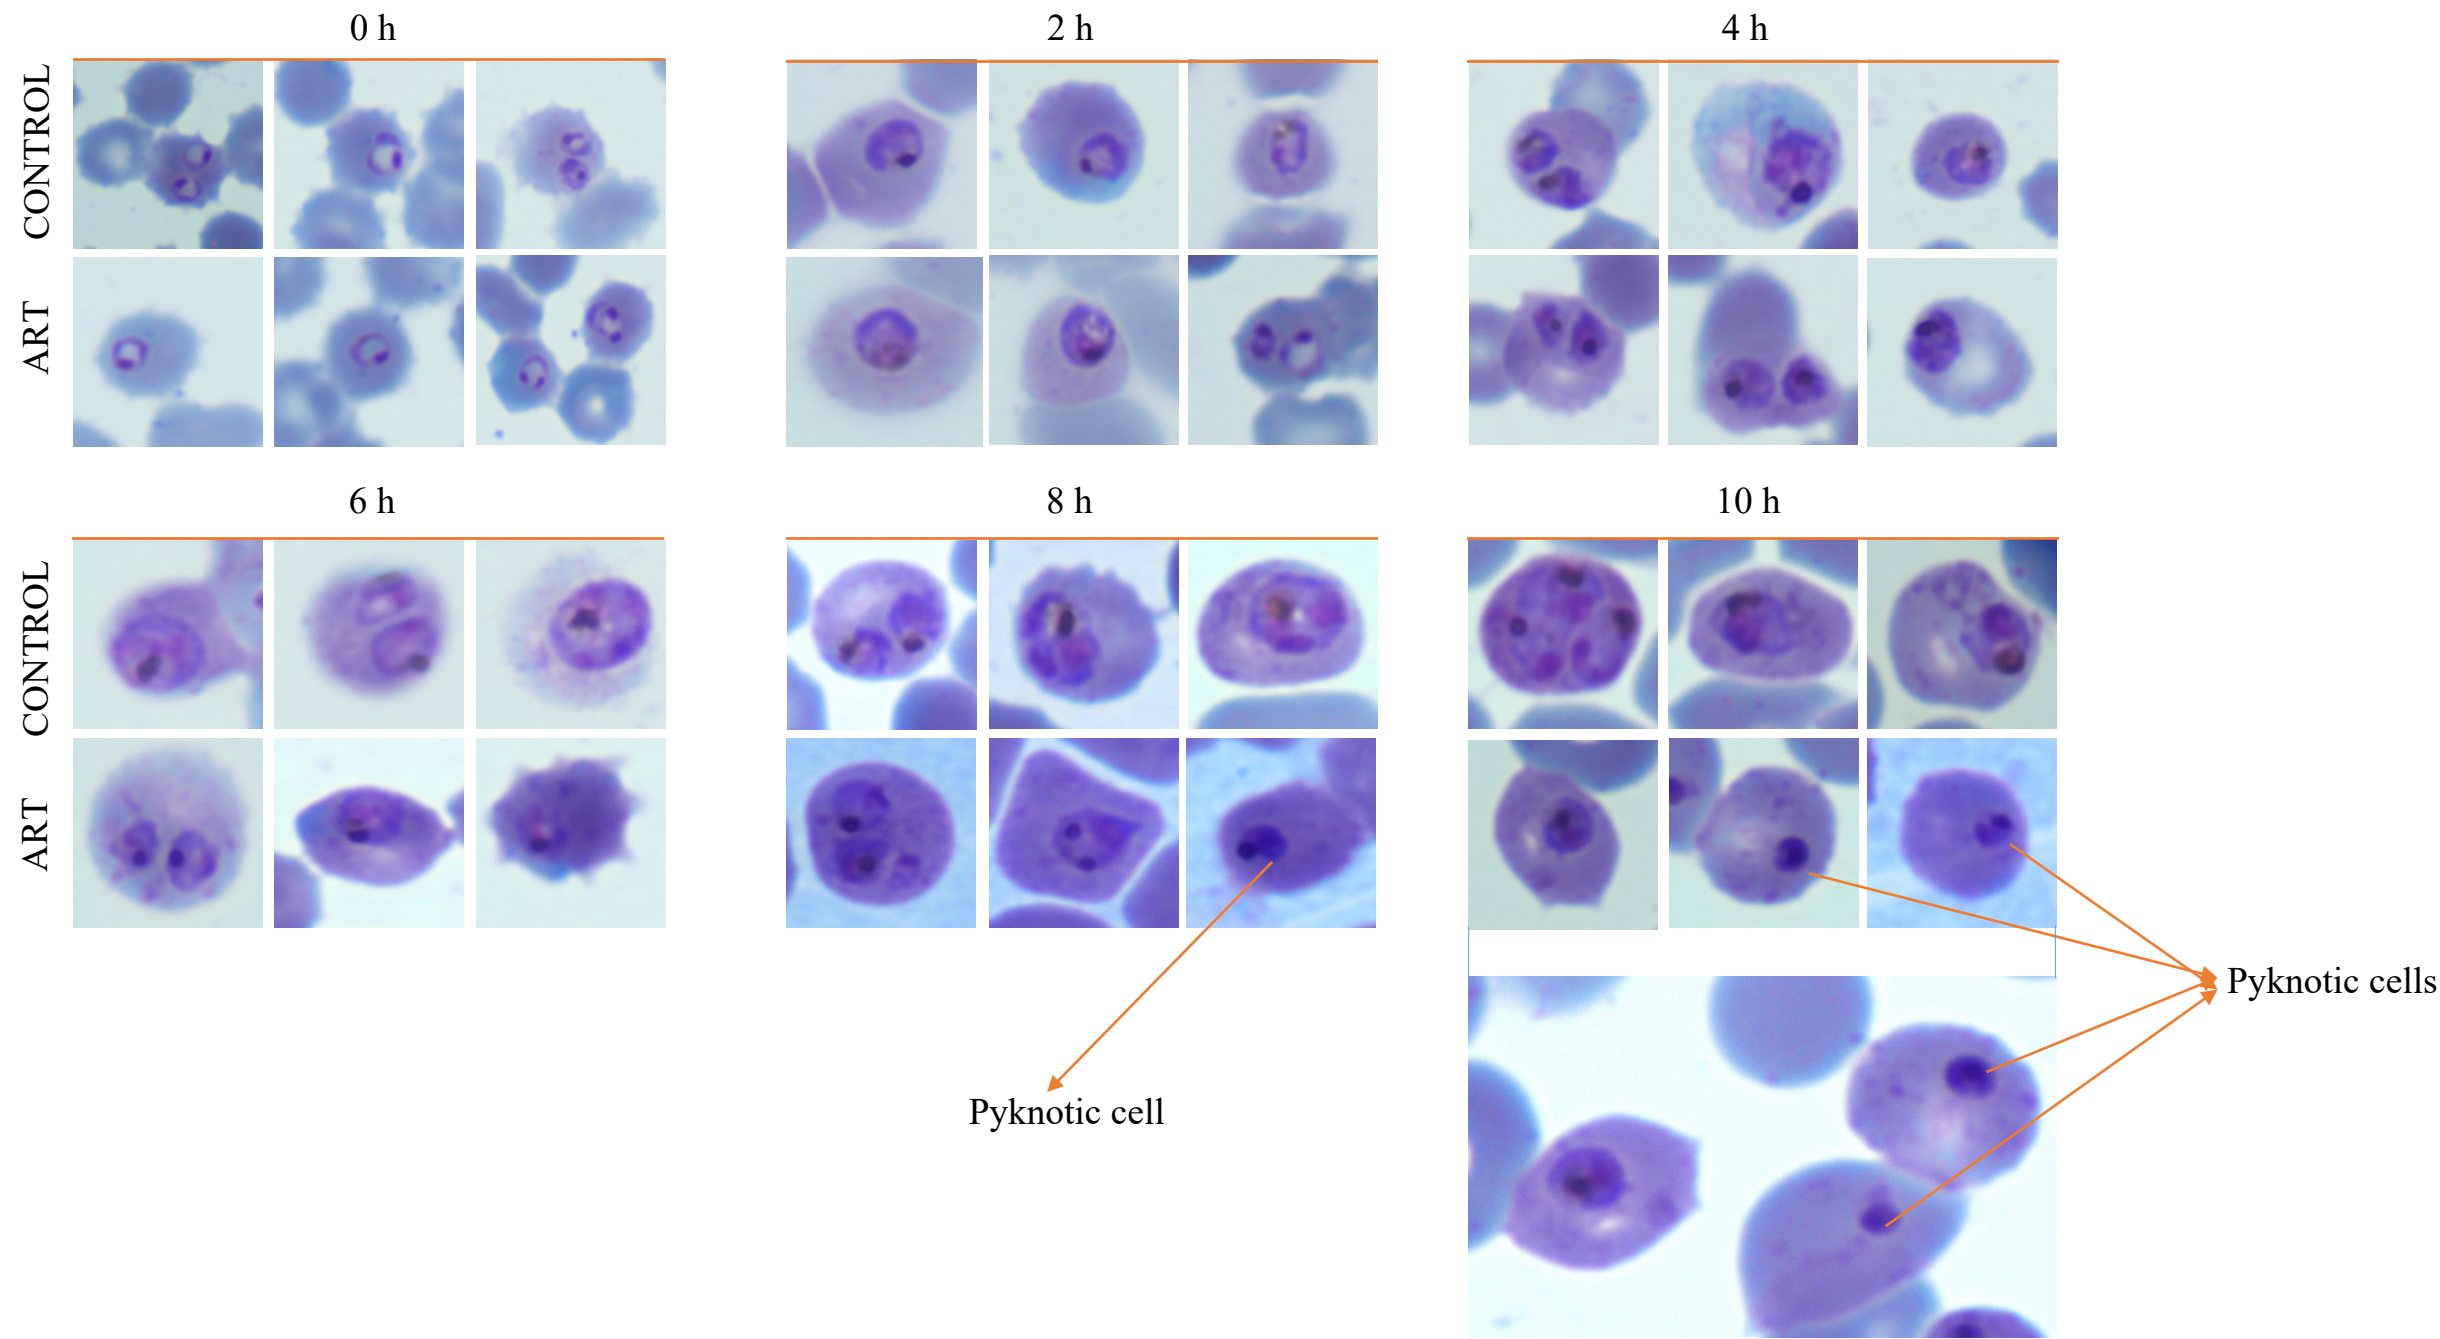

Supplementary Figure S6: SPR binding analysis of the compounds with heme detoxification protein (HDP)

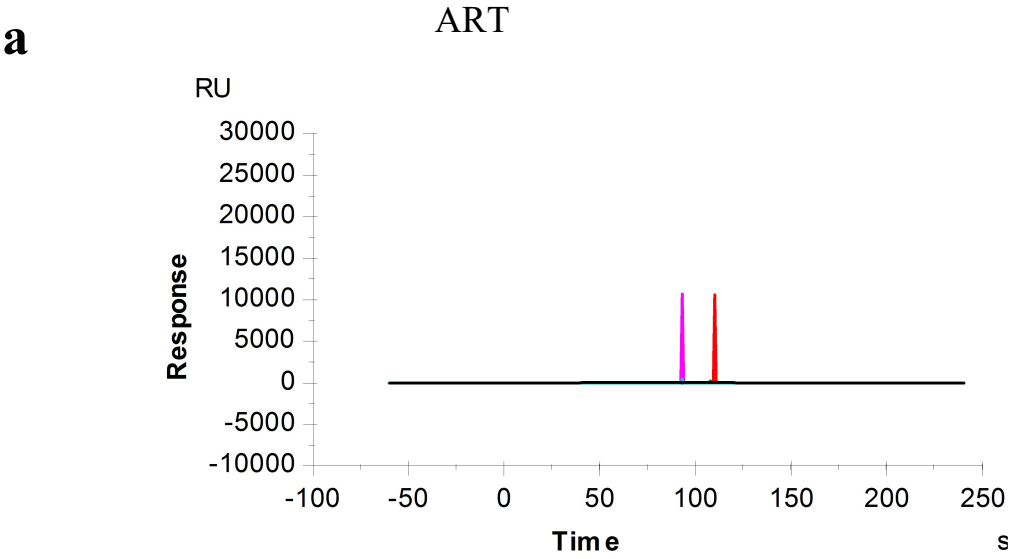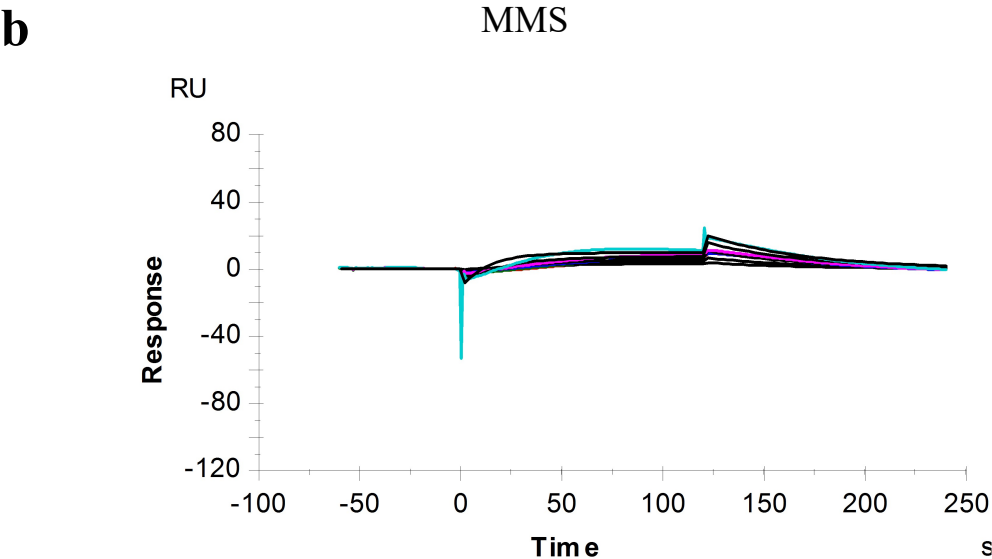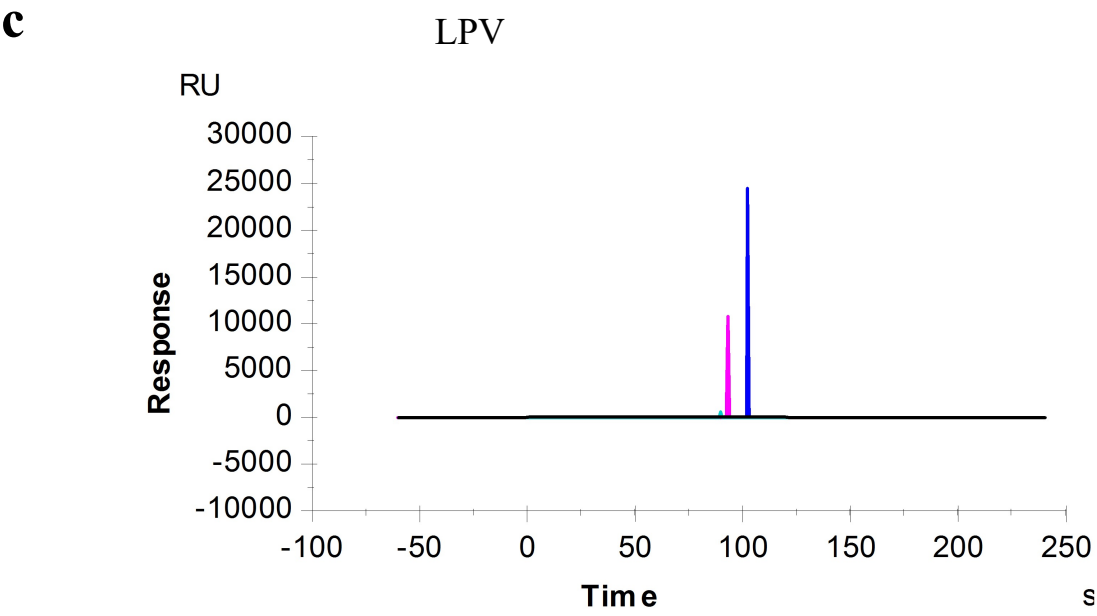

**d**

| Compounds   | Binding Energy (kcal/mol) |
|-------------|---------------------------|
|             | Site Specific Docking     |
| Artemisinin | -5.81                     |
| lopinavir   | -1.43                     |
| Methyl      | -2.67                     |



# Supplementary Figure S7: Multiple sequence analysis of the

## *PfDdi1* gene

**a**

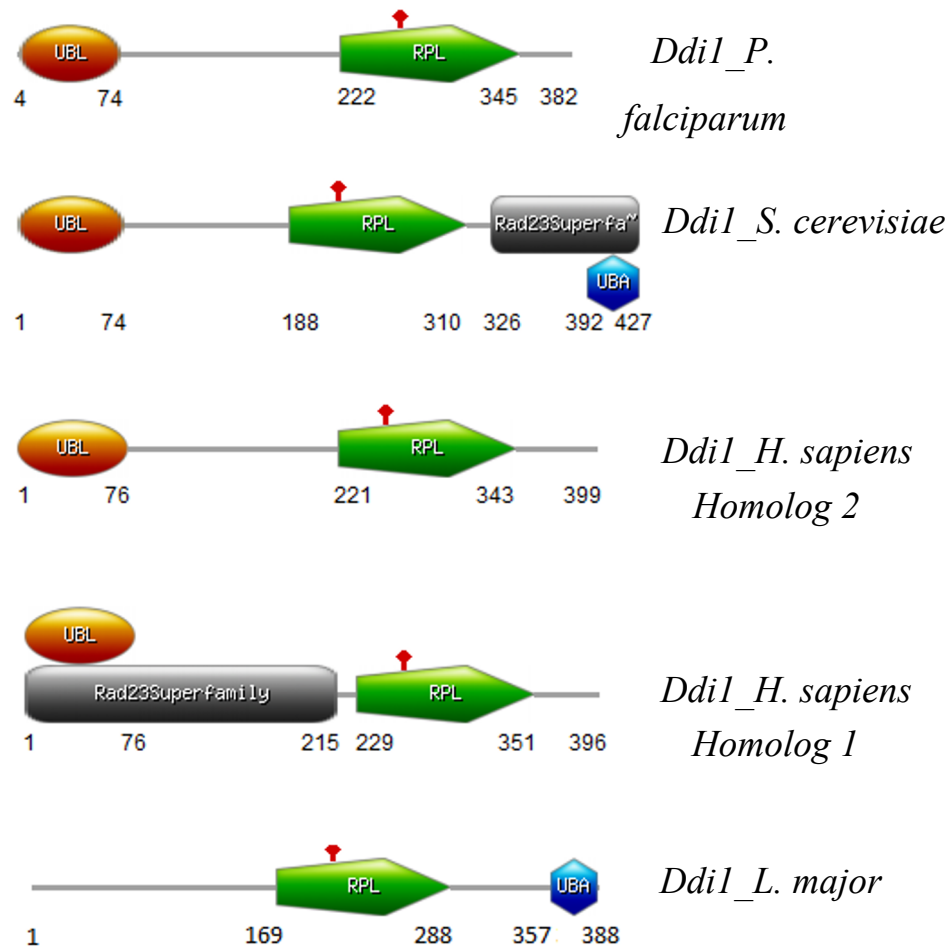

**b**

|                      |                                                                |     |
|----------------------|----------------------------------------------------------------|-----|
| <i>P. falciparum</i> | MVF---ITISDDNNIITSLDVHEDTEIWTIT--NIIENDFSLNMNINELTYNGNAV--D    | 52  |
| <i>S. cerevisiae</i> | MDLT---ISNELTGEIYGPIEVSEDMALTDL--IALLQADCGFDKTKHDLYYNMDILDSN   | 55  |
| <i>H. sapiens</i>    | MLLTVCVRRDLS-EVTFSLQVDADDFELHNFR--ALCELESIGIPAAESQIVYAEERPLT-D | 56  |
| <i>L. major</i>      | -----MVQLTIDNARGVTLCRVSLPANATVQQLLL-----                       | 30  |
|                      | : : : . . ::                                                   |     |
| <i>P. falciparum</i> | KFDTIKKLNIEGDLLEFVRKKISADIMNDNVNMSALNN-----                    | 91  |
| <i>S. cerevisiae</i> | RTQSLKELGLKTDDLLLRGKISNSIQ-----TDAAT-----                      | 87  |
| <i>H. sapiens</i>    | NHRSLASYGLKGDGVILRQKENADPRPPVQFPNLPRIDFSSIAVPGTSSPRQRQPPGTQ    | 116 |
| <i>L. major</i>      | -----QLTVA--KEELRQAQAIRNDVVRHV-----THRLTPAST                   | 61  |
|                      | :                                                              |     |
| <i>P. falciparum</i> | -----ILSTNNNVGNIGNIGNNLNENV--QNLLNPNPAFKTLTDQFKVYQENEYIKK      | 141 |
| <i>S. cerevisiae</i> | --LSDEAFIEQFRQELN-----QMLRSQLILQIPGLNDLVN-----                 | 123 |
| <i>H. sapiens</i>    | QSHSSPGEITSSPQ-----GLDNPALLRDMMLLANPHELS-----                  | 150 |
| <i>L. major</i>      | TTTTTTSVSVSSNAQTLLQAGLVGQGATAETLVVLMAADAPAAAS-----             | 105 |
|                      | : . : :                                                        |     |
| <i>P. falciparum</i> | ESEILLEMKNDSKMAVLKLQDEPLYNAIFSQNLEEIKKIVKEKYETEKEKEKEQQMYE     | 201 |
| <i>S. cerevisiae</i> | -----DPLLFRLRGPLI---LQR---RYGGYNTA---MNP--FGIPQDEYT            | 159 |
| <i>H. sapiens</i>    | -----LLKERNPFLAEALLSGDLEKFSRVLVE---QQQDRARREQERIR              | 191 |
| <i>L. major</i>      | -----SAAAAAPSPTKAVAAQILDLCGASA-----SPSAGVRSQASVV               | 144 |
|                      | .                                                              |     |
| <i>P. falciparum</i> | NALKNPLSEDSQKFIYENIYKNEINNNLALAEHFPEAFGVVFMLYIPVEINKNTVHAFV    | 261 |
| <i>S. cerevisiae</i> | KLMANPDDPDNKKRIAEALLDQQAIIDEQLRNAIEYTPEMPTQVPMYINIEINNPVKAFV   | 219 |
| <i>H. sapiens</i>    | LFSADFPDLEAQAKIEEDIRQQNIEENMTIAMEEAPESFGQVVMYINCKVNGHPVKAFV    | 251 |
| <i>L. major</i>      | PSTMDERQLELQRRYIAQIQQQIDENLANALEYTPFAFAKVTMLYVVPCTINQVLVKAFV   | 204 |
|                      | : . : : * : : : * : : : * * * * * * * : * : * : * * *          |     |
| <i>P. falciparum</i> | DSGAQSSIMSKKCAQKCNILRLMDKRFTGIAGVGTKTILGKIHMIDIKIGNIFYAVSLT    | 321 |
| <i>S. cerevisiae</i> | DTGAQTTIMSTRLAKKTGLSRMIDKRFIGEARGVGTKIIGRIHQAVKIETQYIPCSFT     | 279 |
| <i>H. sapiens</i>    | DSGAQMTIMSQACAERCNIMRLVDRRWAGIAGVGTKIIGRVHLAQVQIEGDFLPCSF      | 311 |
| <i>L. major</i>      | DSGAQNSIMNKRTAERCGLMRLVDVVRMDVAVGVGRQEICGRIHMTFVNLAGMYIPFAFY   | 264 |
|                      | * : * * : * * . * : : . : * : * * * . * * * * * * : : : : : :  |     |
| <i>P. falciparum</i> | IIEDYDIDFIFGLDLLKRHQCLIDFKQNALIIEDN--KIPFLSEKDVISISTQSIDIDAN   | 379 |
| <i>S. cerevisiae</i> | VLD-TDIDVLIGLMDLKRHLACVDLKENVLRIAEV--ETSFLSEAEIPKSFQEGLPAPTS   | 336 |
| <i>H. sapiens</i>    | ILEEQPMDMLLGLMDLKRHQCSIDLKKNVLVIGTTGSQTTFLPEGELPECARLAYGAGRE   | 371 |
| <i>L. major</i>      | VIEDQAMDLIIIGLDQLKRHQMMIDLKHNCCLTIDNI--NVPFLPENDLPALALGDDENAM  | 322 |
|                      | : : : * : : * * * * * : * : * * * : * * * : :                  |     |
| <i>P. falciparum</i> | NDL-----                                                       | 382 |
| <i>S. cerevisiae</i> | VTT---SSDKPLTPKTSSSLPPQPGAVPALAPRTGMGPTPTGRSTAGATTATGRTFPEQ    | 393 |
| <i>H. sapiens</i>    | DVRPEEIIADQELA-EA-----LQKSAEDA-----ERQKP-----                  | 399 |
| <i>L. major</i>      | HA--PRHQDPATTATTAS--NPAAPVLSEG-----ERQARIEGFMTVSGITDPTQ        | 368 |
| <i>P. falciparum</i> | -----                                                          | 382 |
| <i>S. cerevisiae</i> | TIKQLMDLGFPRDAVVKALKQTNGNAEFAASLLFQ-                           | 428 |
| <i>H. sapiens</i>    | -----                                                          | 399 |
| <i>L. major</i>      | AAEL-----LEAADWNPVNVAALLFDT                                    | 390 |
